# Supplementary material for: Evaluation of transport conditions for autologous bone marrow-derived mesenchymal stromal cells for therapeutic application in horses
Source: PeerJ. 2016 Mar 22;4:e1773. doi: 10.7717/peerj.1773 (PMC4806605; doi:10.7717/peerj.1773)
Supplement: Supplemental Information 3 [file peerj-04-1773-s003.xlsx]

## Sheet: Viability Trypan Blue (%)
Condition	Horse 1	Horse 2	Horse 3	Horse 4	Horse 5	Horse 6	Median	Q75	Q25	IQR	p
1. Control 5.000.000 MSC	80.2083	81.4432	84.5238	83.7398	87.9432	81.3953	82.5915	84.3278	81.4073	2.92052
2. Control 10.000.000 MSC	80.9523	83.3333	86.7088	83.7765	87.1165	77.6162	83.5549	85.9757	81.5476	4.42817
3. Control 20.000.000 MSC	73.9747	83.2335	77.7208	79.4538	82.9984	82.633	81.0434	82.907	78.154	4.753
4. Bone marrow supernatant; 4°C; 5.000.000 MSC	75	64.1891	58.5798	47.4452	59.8726	68.8311	62.0309	67.6706	58.903	8.7676	0.028
5. Bone marrow supernatant, 4°C, 10.000.000 MSC	81.9444	68.644	63.6103	49.544	60	60.6413	62.1258	67.3856	60.1603	7.22525	0.046
6. Bone marrow supernatant; 4°C; 20.000.000 MSC	76.7912	64.9016	60.6177	53.77	61.4093	69.186	63.1555	68.1149	60.8156	7.2993	0.046
7. Cryostor; -20°C; 72 h; 5.000.000 MSC	63.1578	51.6129	64.5833	60.3773	63.5658	45.8064	61.7675	63.4638	53.804	9.6598	0.028
8. Cryostor; -20°C; 72 h; 10.000.000 MSC	61.3382	66.0447	69.1131	60.9375	61.8055	68.1286	63.9251	67.6076	61.455	6.1526	0.028
9. Cryostor; -20°C; 72 h; 20.000.000 MSC	61.3162	58.8039	65.0621	58.4415	67.816	66.8292	63.1891	66.3874	59.432	6.95545	0.028

## Sheet: Adipogenic
Condition	Horse 1	Horse 2	Horse 3	Horse 4	Horse 5	Horse 6	Median	Q75	Q25	IQR	p
1. Control 5.000.000 MSC	2	2	3	2	2	2	2	2	2	0
2. Control 10.000.000 MSC	2	2	2	2	2	2	2	2	2	0
3. Control 20.000.000 MSC	2	2	2	3	2	1	2	2	2	0
4. Bone marrow supernatant; 4°C; 5.000.000 MSC	2	2	2	2	2	2	2	2	2	0	0.317
5. Bone marrow supernatant, 4°C, 10.000.000 MSC	2	1	2	2	2	3	2	2	2	0	1
6. Bone marrow supernatant; 4°C; 20.000.000 MSC	3	2	1	2	2	2	2	2	2	0	1
7. Cryostor; -20°C; 72 h; 5.000.000 MSC	2	2	2	2	2	3	2	2	2	0	1
8. Cryostor; -20°C; 72 h; 10.000.000 MSC	2	3	2	2	2	2	2	2	2	0	0.317
9. Cryostor; -20°C; 72 h; 20.000.000 MSC	1	2	2	3	2	2	2	2	2	0	1

## Sheet: Osteogenic early
Condition	Horse 1	Horse 2	Horse 3	Horse 4	Horse 5	Horse 6	Median	Q75	Q25	IQR	p
1. Control 5.000.000 MSC	3	3	3	3	3	3	3	3	3	0
2. Control 10.000.000 MSC	3	2	3	3	3	3	3	3	3	0
3. Control 20.000.000 MSC	3	3	3	3	3	3	3	3	3	0
4. Bone marrow supernatant; 4°C; 5.000.000 MSC	3	3	2	3	3	3	3	3	3	0	0.317
5. Bone marrow supernatant, 4°C, 10.000.000 MSC	3	3	3	3	2	3	3	3	3	0	1
6. Bone marrow supernatant; 4°C; 20.000.000 MSC	3	2	3	3	3	3	3	3	3	0	0.317
7. Cryostor; -20°C; 72 h; 5.000.000 MSC	3	3	3	3	3	3	3	3	3	0	1
8. Cryostor; -20°C; 72 h; 10.000.000 MSC	3	3	3	3	3	3	3	3	3	0	0.317
9. Cryostor; -20°C; 72 h; 20.000.000 MSC	3	3	2	3	3	3	3	3	3	0	0.317

## Sheet: Osteogenic late
Condition	Horse 1	Horse 2	Horse 3	Horse 4	Horse 5	Horse 6	Median	Q75	Q25	IQR	p
1. Control 5.000.000 MSC	3	3	3	3	3	3	3	3	3	0
2. Control 10.000.000 MSC	2	3	3	3	3	3	3	3	3	0
3. Control 20.000.000 MSC	3	3	3	3	3	3	3	3	3	0
4. Bone marrow supernatant; 4°C; 5.000.000 MSC	3	3	3	2	3	2	3	3	2.25	0.75	0.157
5. Bone marrow supernatant, 4°C, 10.000.000 MSC	3	2	3	3	3	3	3	3	3	0	1
6. Bone marrow supernatant; 4°C; 20.000.000 MSC	3	3	3	3	3	3	3	3	3	0	1
7. Cryostor; -20°C; 72 h; 5.000.000 MSC	3	3	2	3	3	3	3	3	3	0	0.317
8. Cryostor; -20°C; 72 h; 10.000.000 MSC	2	3	3	2	3	3	3	3	2.25	0.75	0.317
9. Cryostor; -20°C; 72 h; 20.000.000 MSC	3	3	3	3	3	3	3	3	3	0	1

## Sheet: Chondrogenic SO
Condition	Horse 1	Horse 2	Horse 3	Horse 4	Horse 5	Horse 6	Median	Q75	Q25	IQR	p
1. Control 5.000.000 MSC	2.5	3	2.5	3.5	1.5	3.5	2.75	3.375	2.5	0.875
2. Control 10.000.000 MSC	2	4	3	2.5	2.5	4.5	2.75	3.75	2.5	1.25
3. Control 20.000.000 MSC	2.5	3.5	2.5	3	2	4.5	2.75	3.375	2.5	0.875
4. Bone marrow supernatant; 4°C; 5.000.000 MSC	2	2	4	3	1	3	2.5	3	2	1	0.332
5. Bone marrow supernatant, 4°C, 10.000.000 MSC	1	2.5	3	2.5	3.5	4	2.75	3.375	2.5	0.875	0.357
6. Bone marrow supernatant; 4°C; 20.000.000 MSC	3	2	3	3.5	2.5	4	3	3.375	2.625	0.75	0.739
7. Cryostor; -20°C; 72 h; 5.000.000 MSC	3	3	2.5	3	3	2	3	3	2.625	0.375	1
8. Cryostor; -20°C; 72 h; 10.000.000 MSC	2	2	1	2.5	2.5	5	2.25	2.5	2	0.5	0.276
9. Cryostor; -20°C; 72 h; 20.000.000 MSC	2.5	3	2	2.5	2	4	2.5	2.875	2.125	0.75	0.046

## Sheet: Chondrogenic AB
Condition	Horse 1	Horse 2	Horse 3	Horse 4	Horse 5	Horse 6	Median	Q75	Q25	IQR	p
1. Control 5.000.000 MSC	1	2	2	3	2.5	2	2	2.375	2	0.375
2. Control 10.000.000 MSC	2	3	2	2	2	2.5	2	2.375	2	0.375
3. Control 20.000.000 MSC	1.5	2	2.5	1.5	3	2	2	2.375	1.625	0.75
4. Bone marrow supernatant; 4°C; 5.000.000 MSC	1	2	2	1	1.5	1	1.25	1.875	1	0.875	0.102
5. Bone marrow supernatant, 4°C, 10.000.000 MSC	1.5	2.5	2.5	2	2	2	2	2.375	2	0.375	0.317
6. Bone marrow supernatant; 4°C; 20.000.000 MSC	1	2	2	1	3	2	2	2	1.25	0.75	0.083
7. Cryostor; -20°C; 72 h; 5.000.000 MSC	2	2.5	2	2	2	1.5	2	2	2	0	0.783
8. Cryostor; -20°C; 72 h; 10.000.000 MSC	1	3	1	2	2.5	2	2	2.375	1.25	1.125	0.194
9. Cryostor; -20°C; 72 h; 20.000.000 MSC	1.5	2	2	1	3	3	2	2.75	1.625	1.125	1

## Sheet: Chondrogenic MT
Condition	Horse 1	Horse 2	Horse 3	Horse 4	Horse 5	Horse 6	Median	Q75	Q25	IQR	p
1. Control 5.000.000 MSC	1.5	1.5	3	2	3	2	2	2.75	1.625	1.125
2. Control 10.000.000 MSC	2.5	2	1.5	3	2.5	2	2.25	2.5	2	0.5
3. Control 20.000.000 MSC	2	3	1	2	3	1.5	2	2.75	1.625	1.125
4. Bone marrow supernatant; 4°C; 5.000.000 MSC	1.5	3	2	3	3	1	2.5	3	1.625	1.375	0.705
5. Bone marrow supernatant, 4°C, 10.000.000 MSC	2	1.5	2	1.5	2	2	2	2	1.625	0.375	0.157
6. Bone marrow supernatant; 4°C; 20.000.000 MSC	2.5	2	3	1	1	2	2	2.375	1.25	1.125	0.672
7. Cryostor; -20°C; 72 h; 5.000.000 MSC	2.5	2	1	2	2	1.5	2	2	1.625	0.375	0.496
8. Cryostor; -20°C; 72 h; 10.000.000 MSC	2	2.5	2	1.5	1	2	2	2	1.625	0.375	0.334
9. Cryostor; -20°C; 72 h; 20.000.000 MSC	2	2	3	1.5	2	1.5	2	2	1.625	0.375	0.713

## Sheet: CPD
	P4											P5											P6											P7
Condition	Horse 1	Horse 2	Horse 3	Horse 4	Horse 5	Horse 6	Median	Q75	Q25	IQR		Horse 1	Horse 2	Horse 3	Horse 4	Horse 5	Horse 6	Median	Q75	Q25	IQR		Horse 1	Horse 2	Horse 3	Horse 4	Horse 5	Horse 6	Median	Q75	Q25	IQR		Horse 1	Horse 2	Horse 3	Horse 4	Horse 5	Horse 6	Median	Q75	Q25	IQR		p
1. Control 5.000.000 MSC	6.06782	6.24009	6.2707	6.2167	6.07651	5.9593	6.1466	6.23425	6.06999	0.164254		12.6445	11.9874	12.1725	11.9962	11.3968	11.8415	11.9918	12.1285	11.8779	0.250523		17.7612	16.9443	17.5218	16.9531	15.3884	17.0714	17.0122	17.4092	16.9465	0.462709		22.7275	21.1561	21.5495	20.6401	18.7751	20.249	20.8981	21.4511	20.3468	1.10435
2. Control 10.000.000 MSC	6.51084	5.93085	6.50119	6.31543	6.26311	6.08514	6.28927	6.45475	6.12963	0.325115		12.7236	11.783	11.6675	11.6789	11.5688	11.8753	11.731	11.8522	11.6704	0.181836		18.0657	16.9412	16.0427	16.5587	15.2098	17.017	16.7499	16.9981	16.1717	0.826377		22.6975	21.2591	20.0342	20.0265	18.1044	20.5617	20.2979	21.0847	20.0284	1.05629
3. Control 20.000.000 MSC	6.51404	6.11074	6.27825	5.74184	6.33004	6.11074	6.19449	6.31709	6.11074	0.206357		12.7425	11.6727	11.0122	11.3994	12.2023	12.0126	11.8426	12.1548	11.4677	0.687113		18.1886	16.6011	15.997	16.3656	16.6856	17.0337	16.6433	16.9467	16.4245	0.522197		22.7481	20.8745	19.7285	20.2429	19.9566	20.7207	20.4818	20.836	20.0282	0.807873
4. Bone marrow supernatant; 4°C; 5.000.000 MSC	6.24781	5.22991	5.73637	5.62244	5.82147	6.06782	5.77892	6.00623	5.65092	0.35531		12.6137	10.8041	11.128	11.1594	11.6532	11.5005	11.33	11.6151	11.1358	0.479232		18.0123	15.5812	15.675	16.049	16.2003	16.5572	16.1247	16.468	15.7685	0.699435		22.4693	19.8242	18.2172	20.0405	19.6681	19.8281	19.8262	19.9874	19.7072	0.280293		0.173
5. Bone marrow supernatant, 4°C, 10.000.000 MSC	6.50763	5.45949	5.97796	5.76887	5.40542	6.40785	5.87342	6.30038	5.53684	0.763543		13.0843	11.2068	11.5275	11.3184	10.8781	11.854	11.4229	11.7724	11.2347	0.5377		18.9763	15.1612	16.171	16.1166	14.6096	16.7632	16.1438	16.6151	15.4001	1.21505		23.4066	19.2922	19.858	19.9537	17.7873	20.5164	19.9059	20.3757	19.4337	0.942051		0.249
6. Bone marrow supernatant; 4°C; 20.000.000 MSC	6.53941	5.29081	6.07651	5.86221	5.92124	6.29324	5.99887	6.23906	5.87697	0.36209		12.5985	11.0704	11.5092	11.2398	11.6355	12.0514	11.5724	11.9474	11.3072	0.640238		18.0108	16.2448	15.4637	15.9405	15.7329	17.2578	16.0926	17.0045	15.7848	1.21968		21.6045	19.5748	18.1023	19.4852	18.2244	21.1547	19.53	20.7597	18.5396	2.22015		0.046
7. Cryostor; -20°C; 72 h; 5.000.000 MSC	6.50119	5.33486	5.57423	4.93797	5.58643	5.85213	5.58033	5.7857	5.3947	0.391003		12.71	11.2847	10.7727	10.1833	11.6543	12.061	11.4695	11.9593	10.9007	1.05857		18.3848	15.9854	15.2819	14.5863	16.3209	17.1522	16.1532	16.9444	15.4578	1.48665		22.9566	19.8226	18.923	17.6642	20.0742	20.2974	19.9484	20.2416	19.1479	1.09371		0.345
8. Cryostor; -20°C; 72 h; 10.000.000 MSC	6.52043	5.44616	5.52435	5.16633	6.02359	6.43514	5.77397	6.33225	5.46571	0.866542		12.8505	11.4055	10.2583	10.1785	11.8242	12.7432	11.6149	12.5135	10.5451	1.96838		18.6771	16.3994	14.286	14.2759	16.4443	17.5828	16.4218	17.2981	14.8143	2.48379		23.0382	20.5633	17.9271	17.8452	19.6848	20.8835	20.124	20.8035	18.3665	2.43699		0.463
9. Cryostor; -20°C; 72 h; 20.000.000 MSC	6.68296	5.45949	5.5495	5.18249	5.97796	6.11917	5.76373	6.08387	5.48199	0.601875		13.2779	11.684	10.3685	10.0423	11.8199	12.0785	11.752	12.0138	10.6974	1.31643		19.1846	16.6596	14.5324	14.3891	16.2091	17.0906	16.4343	16.9829	14.9516	2.03125		23.8397	20.9628	18.2857	17.5342	19.1798	19.9455	19.5627	20.7085	18.5092	2.19925		0.249

## Sheet: Viability Trypan Blue (number)
Condition	Horse 1	Horse 2	Horse 3	Horse 4	Horse 5	Horse 6	Median	Q75	Q25	IQR
1. Control 5.000.000 MSC	1925000	3100000	1975000	3500000	3550000	2575000	2837500	3400000	2125000	1275000
2. Control 10.000.000 MSC	4675000	7100000	7625000	6675000	6850000	7875000	6975000	7493750	6718750	775000
3. Control 20.000.000 MSC	11725000	13425000	14150000	14750000	15175000	15275000	14450000	15068750	13606250	1462500
4. Bone marrow supernatant; 4°C; 5.000.000 MSC	2700000	2350000	2375000	2650000	2475000	1625000	2425000	2606250	2356250	250000
5. Bone marrow supernatant, 4°C, 10.000.000 MSC	5900000	4650000	6075000	5200000	5550000	4075000	5375000	5812500	4787500	1025000
6. Bone marrow supernatant; 4°C; 20.000.000 MSC	12325000	9150000	10725000	11900000	11775000	10875000	11325000	11868750	10762500	1106250
7. Cryostor; -20°C; 72 h; 5.000.000 MSC	1800000	2050000	1200000	1775000	1550000	1600000	1687500	1793750	1562500	231250
8. Cryostor; -20°C; 72 h; 10.000.000 MSC	4125000	4450000	4425000	2725000	5650000	3900000	4275000	4443750	3956250	487500
9. Cryostor; -20°C; 72 h; 20.000.000 MSC	9550000	11800000	8850000	13700000	10475000	9000000	10012500	11468750	9137500	2331250
